# Supplementary material for: Estimating the Per-Contact Probability of Infection by Highly Pathogenic Avian Influenza (H7N7) Virus during the 2003 Epidemic in The Netherlands
Source: PLoS One. 2012 Jul 13;7(7):e40929. doi: 10.1371/journal.pone.0040929 (PMC3396644; doi:10.1371/journal.pone.0040929)
Supplement: Table S2 — The observed number of genetically matching pairs (A, B), within 28 pairs of outbreak farms linked by traced contacts, for different criteria of defining a genetic match. (DOC) [file pone.0040929.s002.doc]

**Table S2.** The observed number of genetically matching pairs (A, B), within 28 pairs of outbreak farms linked by traced contacts, for different criteria of defining a genetic match. Our analysis of transmission probabilities of contact types predicts transmission to occur from A to B for an expected number of 8.961 pairs within the 28 (due to the traced contacts). This number is obtained by multiplying the expected number of transmission pairs (which is 15.96) by a scaling factor of 0.5615. This scaling factor is the expected contribution of 28 contacts relative to that of the 56 based on a weighted count of the contacts of each type (given in Table S1), using the per-contact transmission probabilities as weights.

|  | No lost mutations in B compared to A | No lost mutations AND ≤6 additional mutations in B compared to A | No lost mutations AND ≤3 addition mutations in B compared to A | No lost mutations AND no additional mutations in B compared to A |
| --- | --- | --- | --- | --- |
| #matching pairs (out of the 28 pairs); M | 9 | 5 | 5 | 2 |
| Counts of pairs meeting criterion; n_c | 2125 | 1231 | 886 | 182 |
| ‘probability of chance agreement’;p_c=n_c/(184x183)$ | 0.06311 | 0.0366 | 0.0263 | 0.00541 |
| Expected number of chance matches; R=p_c*28 | 1.77 | 1.02 | 0.74 | 0.15 |
| Matching pairs corrected for chance (M-R) | 7.23 | 3.98 | 4.26 | 1.85 |

$ The total number of pairs possible is 184×183 as there are 184 outbreak farms for which sequencing information is available and for any two farms A and B, the pair (A, B) is different from (B, A).
